# Supplementary material for: Trends in Methadone Dispensing for Opioid Use Disorder After Medicare Payment Policy Changes
Source: PubMed Central journal article supplement (PMC10199341; doi:10.1001/jamanetworkopen.2023.14328), 2023-05-19
Supplement: jamanetwopen-e2314328-s001.pdf [file jamanetwopen-e2314328-s001.pdf]

## Supplementary Online Content

Taylor EA, Cantor JH, Bradford AC, Simon K, Stein BD. Trends in methadone dispensing for opioid use disorder after Medicare payment policy changes. *JAMA Netw Open*. 2023;6(5):e2314328. doi:10.1001/jamanetworkopen.2023.14328

**eTable 1.** Buprenorphine NDC Codes

**eTable 2.** Methadone Dispensing Rates per 1000 MA Enrollees, by Dispensing Type

**eTable 3.** Methadone Dispensing Rates per 1000 MA Enrollees, by Age and Dual Eligibility Status

**eTable 4.** Rates of Buprenorphine Dispensed From Pharmacies per 1000 MA Enrollees, by Age

This supplementary material has been provided by the authors to give readers additional information about their work.

**eTable 1.** Buprenorphine NDC Codes

| NDC       | Drug Name                   | Formulation |
|-----------|-----------------------------|-------------|
| 54017613  | BUPRENORPHINE HYDROCHLORIDE | Tablet      |
| 54017713  | BUPRENORPHINE HYDROCHLORIDE | Tablet      |
| 54018813  | BUPRENORPHINE-NALOXONE      | Tablet      |
| 54018913  | BUPRENORPHINE-NALOXONE      | Tablet      |
| 93537856  | BUPRENORPHINE HYDROCHLORIDE | Tablet      |
| 93537956  | BUPRENORPHINE HYDROCHLORIDE | Tablet      |
| 93572056  | BUPRENORPHINE-NALOXONE      | Tablet      |
| 93572156  | BUPRENORPHINE-NALOXONE      | Tablet      |
| 228315303 | BUPRENORPHINE HYDROCHLORIDE | Tablet      |
| 228315403 | BUPRENORPHINE-NALOXONE      | Tablet      |
| 228315473 | BUPRENORPHINE-NALOXONE      | Tablet      |
| 228315503 | BUPRENORPHINE-NALOXONE      | Tablet      |
| 228315567 | BUPRENORPHINE-NALOXONE      | Tablet      |
| 228315573 | BUPRENORPHINE-NALOXONE      | Tablet      |
| 228315603 | BUPRENORPHINE HYDROCHLORIDE | Tablet      |
| 378092393 | BUPRENORPHINE HYDROCHLORIDE | Tablet      |
| 378092493 | BUPRENORPHINE HYDROCHLORIDE | Tablet      |
| 378876593 | BUPRENORPHINE-NALOXONE      | Film        |
| 378876693 | BUPRENORPHINE-NALOXONE      | Film        |
| 378876716 | BUPRENORPHINE-NALOXONE      | Film        |
| 378876793 | BUPRENORPHINE-NALOXONE      | Film        |
| 378876816 | BUPRENORPHINE-NALOXONE      | Film        |
| 378876893 | BUPRENORPHINE-NALOXONE      | Film        |
| 406192303 | BUPRENORPHINE-NALOXONE      | Tablet      |
| 406192309 | BUPRENORPHINE-NALOXONE      | Tablet      |
| 406192403 | BUPRENORPHINE-NALOXONE      | Tablet      |
| 406192409 | BUPRENORPHINE-NALOXONE      | Tablet      |
| 406800503 | BUPRENORPHINE-NALOXONE      | Tablet      |
| 406802003 | BUPRENORPHINE-NALOXONE      | Tablet      |
| 490005100 | SUBOXONE                    | Tablet      |
| 490005130 | SUBOXONE                    | Tablet      |
| 490005160 | SUBOXONE                    | Tablet      |
| 490005190 | SUBOXONE                    | Tablet      |
| 781721664 | BUPRENORPHINE-NALOXONE      | Film        |
| 781722764 | BUPRENORPHINE-NALOXONE      | Film        |
| 781723806 | BUPRENORPHINE-NALOXONE      | Film        |
| 781723864 | BUPRENORPHINE-NALOXONE      | Film        |

| NDC         | Drug Name                   | Formulation                   |
|-------------|-----------------------------|-------------------------------|
| 781724964   | BUPRENORPHINE-NALOXONE      | Film                          |
| 12496010001 | SUBLOCADE                   | Extended Release Subcutaneous |
| 12496010002 | SUBLOCADE 100MG             | Solution, Extended Release    |
| 12496010005 | SUBLOCADE 100MG             | Solution, Extended Release    |
| 12496030001 | SUBLOCADE                   | Extended Release Subcutaneous |
| 12496030002 | SUBLOCADE                   | Extended Release Subcutaneous |
| 12496030005 | SUBLOCADE                   | Extended Release Subcutaneous |
| 12496120201 | SUBOXONE                    | Film                          |
| 12496120203 | SUBOXONE                    | Film                          |
| 12496120401 | SUBOXONE                    | Film                          |
| 12496120403 | SUBOXONE                    | Film                          |
| 12496120801 | SUBOXONE                    | Film                          |
| 12496120803 | SUBOXONE                    | Film                          |
| 12496121201 | SUBOXONE                    | Film                          |
| 12496121203 | SUBOXONE                    | Film                          |
| 12496127802 | SUBUTEX                     | Tablet                        |
| 12496128302 | SUBOXONE                    | Tablet                        |
| 12496130602 | SUBOXONE                    | Tablet                        |
| 12496131002 | SUBUTEX                     | Tablet                        |
| 16590066605 | SUBOXONE                    | Tablet                        |
| 16590066630 | SUBOXONE                    | Tablet                        |
| 16590066705 | SUBOXONE                    | Tablet                        |
| 16590066730 | SUBOXONE                    | Tablet                        |
| 16590066790 | SUBOXONE                    | Tablet                        |
| 23490927003 | SUBOXONE                    | Tablet                        |
| 23490927006 | SUBOXONE                    | Tablet                        |
| 23490927009 | SUBOXONE                    | Tablet                        |
| 35356000407 | SUBOXONE                    | Tablet                        |
| 35356000430 | SUBOXONE                    | Tablet                        |
| 35356055530 | BUPRENORPHINE HYDROCHLORIDE | Tablet                        |
| 35356055630 | BUPRENORPHINE HYDROCHLORIDE | Tablet                        |
| 42291017430 | BUPRENORPHINE-NALOXONE      | Tablet                        |
| 42291017530 | BUPRENORPHINE-NALOXONE      | Tablet                        |
| 42858050103 | BUPRENORPHINE HYDROCHLORIDE | Tablet                        |
| 42858050203 | BUPRENORPHINE HYDROCHLORIDE | Tablet                        |
| 43063018407 | SUBOXONE                    | Tablet                        |
| 43063018430 | SUBOXONE                    | Tablet                        |
| 43063066706 | BUPRENORPHINE HYDROCHLORIDE | Tablet                        |
| 43063075306 | BUPRENORPHINE HYDROCHLORIDE | Tablet                        |

| NDC         | Drug Name                   | Formulation |
|-------------|-----------------------------|-------------|
| 43598057901 | BUPRENORPHINE-NALOXONE      | Film        |
| 43598057930 | BUPRENORPHINE-NALOXONE      | Film        |
| 43598058001 | BUPRENORPHINE-NALOXONE      | Film        |
| 43598058030 | BUPRENORPHINE-NALOXONE      | Film        |
| 43598058101 | BUPRENORPHINE-NALOXONE      | Film        |
| 43598058130 | BUPRENORPHINE-NALOXONE      | Film        |
| 43598058201 | BUPRENORPHINE-NALOXONE      | Film        |
| 43598058230 | BUPRENORPHINE-NALOXONE      | Film        |
| 47781035503 | BUPRENORPHINE-NALOXONE      | Film        |
| 47781035603 | BUPRENORPHINE-NALOXONE      | Film        |
| 47781035703 | BUPRENORPHINE-NALOXONE      | Film        |
| 47781035803 | BUPRENORPHINE-NALOXONE      | Film        |
| 47781071203 | BUPRENORPHINE-NALOXONE      | Film        |
| 47781071211 | BUPRENORPHINE-NALOXONE      | Film        |
| 49999039507 | SUBOXONE                    | Tablet      |
| 49999039515 | SUBOXONE                    | Tablet      |
| 49999039530 | SUBOXONE                    | Tablet      |
| 49999063830 | SUBUTEX                     | Tablet      |
| 49999063930 | SUBUTEX                     | Tablet      |
| 50090157100 | BUPRENORPHINE HYDROCHLORIDE | Tablet      |
| 50090292400 | BUPRENORPHINE HYDROCHLORIDE | Tablet      |
| 50268014411 | BUPRENORPHINE-NALOXONE      | Tablet      |
| 50268014415 | BUPRENORPHINE-NALOXONE      | Tablet      |
| 50268014511 | BUPRENORPHINE-NALOXONE      | Tablet      |
| 50268014515 | BUPRENORPHINE-NALOXONE      | Tablet      |
| 50383028793 | BUPRENORPHINE-NALOXONE      | Tablet      |
| 50383029493 | BUPRENORPHINE-NALOXONE      | Tablet      |
| 50383092493 | BUPRENORPHINE HYDROCHLORIDE | Tablet      |
| 50383093093 | BUPRENORPHINE HYDROCHLORIDE | Tablet      |
| 52427069203 | BUPRENORPHINE-NALOXONE      | Film        |
| 52427069211 | BUPRENORPHINE-NALOXONE      | Film        |
| 52427069403 | BUPRENORPHINE-NALOXONE      | Film        |
| 52427069411 | BUPRENORPHINE-NALOXONE      | Film        |
| 52427069803 | BUPRENORPHINE-NALOXONE      | Film        |
| 52427069811 | BUPRENORPHINE-NALOXONE      | Film        |
| 52440010014 | PROBUPHINE                  | Implant     |
| 52959030430 | SUBOXONE                    | Tablet      |
| 52959074930 | SUBOXONE                    | Tablet      |
| 53217013830 | BUPRENORPHINE-NALOXONE      | Tablet      |

| NDC         | Drug Name                   | Formulation |
|-------------|-----------------------------|-------------|
| 53217024630 | BUPRENORPHINE HYDROCHLORIDE | Tablet      |
| 54123011430 | ZUBSOLV                     | Tablet      |
| 54123090730 | ZUBSOLV                     | Tablet      |
| 54123091430 | ZUBSOLV                     | Tablet      |
| 54123092930 | ZUBSOLV                     | Tablet      |
| 54123095730 | ZUBSOLV                     | Tablet      |
| 54123098630 | ZUBSOLV                     | Tablet      |
| 54569549600 | SUBOXONE                    | Tablet      |
| 54569573900 | SUBOXONE                    | Tablet      |
| 54569573901 | SUBOXONE                    | Tablet      |
| 54569573902 | SUBOXONE                    | Tablet      |
| 54569639900 | SUBOXONE                    | Film        |
| 54569640800 | BUPRENORPHINE-NALOXONE      | Tablet      |
| 54569657800 | BUPRENORPHINE HYDROCHLORIDE | Tablet      |
| 54868570700 | SUBOXONE                    | Tablet      |
| 54868570701 | SUBOXONE                    | Tablet      |
| 54868570702 | SUBOXONE                    | Tablet      |
| 54868570703 | SUBOXONE                    | Tablet      |
| 54868570704 | SUBOXONE                    | Tablet      |
| 54868575000 | SUBOXONE                    | Tablet      |
| 55045378403 | SUBOXONE                    | Tablet      |
| 55700014730 | SUBOXONE                    | Film        |
| 55700018430 | BUPRENORPHINE-NALOXONE      | Tablet      |
| 55700030230 | BUPRENORPHINE HYDROCHLORIDE | Tablet      |
| 55700030330 | BUPRENORPHINE HYDROCHLORIDE | Tablet      |
| 55887031204 | SUBOXONE                    | Tablet      |
| 55887031215 | SUBOXONE                    | Tablet      |
| 58284010014 | PROBUPHINE                  | Implant     |
| 59385001201 | BUNAVAIL                    | Film        |
| 59385001230 | BUNAVAIL                    | Film        |
| 59385001401 | BUNAVAIL                    | Film        |
| 59385001430 | BUNAVAIL                    | Film        |
| 59385001601 | BUNAVAIL                    | Film        |
| 59385001630 | BUNAVAIL                    | Film        |
| 60429058630 | BUPRENORPHINE-NALOXONE      | Tablet      |
| 60429058633 | BUPRENORPHINE-NALOXONE      | Tablet      |
| 60429058730 | BUPRENORPHINE-NALOXONE      | Tablet      |
| 60429058733 | BUPRENORPHINE-NALOXONE      | Tablet      |
| 60687048111 | BUPRENORPHINE               | Tablet      |

| NDC         | Drug Name                   | Formulation |
|-------------|-----------------------------|-------------|
| 60687048121 | BUPRENORPHINE               | Tablet      |
| 60687049211 | BUPRENORPHINE               | Tablet      |
| 60687049221 | BUPRENORPHINE               | Tablet      |
| 60846097003 | BUPRENORPHINE-NALOXONE      | Tablet      |
| 60846097103 | BUPRENORPHINE-NALOXONE      | Tablet      |
| 62175045232 | BUPRENORPHINE-NALOXONE      | Tablet      |
| 62175045832 | BUPRENORPHINE-NALOXONE      | Tablet      |
| 62756045964 | BUPRENORPHINE HYDROCHLORIDE | Tablet      |
| 62756045983 | BUPRENORPHINE HYDROCHLORIDE | Tablet      |
| 62756046064 | BUPRENORPHINE HYDROCHLORIDE | Tablet      |
| 62756046083 | BUPRENORPHINE HYDROCHLORIDE | Tablet      |
| 62756096964 | BUPRENORPHINE-NALOXONE      | Tablet      |
| 62756096983 | BUPRENORPHINE-NALOXONE      | Tablet      |
| 62756097064 | BUPRENORPHINE-NALOXONE      | Tablet      |
| 62756097083 | BUPRENORPHINE-NALOXONE      | Tablet      |
| 63629403401 | SUBOXONE                    | Tablet      |
| 63629403402 | SUBOXONE                    | Tablet      |
| 63629403403 | SUBOXONE                    | Tablet      |
| 63629409201 | SUBUTEX                     | Tablet      |
| 63629409202 | SUBUTEX                     | Tablet      |
| 63629507401 | BUPRENORPHINE-NALOXONE      | Tablet      |
| 63629712501 | BUPRENORPHINE HYDROCHLORIDE | Tablet      |
| 63629712502 | BUPRENORPHINE HYDROCHLORIDE | Tablet      |
| 63629712503 | BUPRENORPHINE HYDROCHLORIDE | Tablet      |
| 63629712504 | BUPRENORPHINE HYDROCHLORIDE | Tablet      |
| 63629712505 | BUPRENORPHINE HYDROCHLORIDE | Tablet      |
| 63629712506 | BUPRENORPHINE HYDROCHLORIDE | Tablet      |
| 63629712507 | BUPRENORPHINE HYDROCHLORIDE | Tablet      |
| 63629712601 | BUPRENORPHINE HYDROCHLORIDE | Tablet      |
| 63629712602 | BUPRENORPHINE HYDROCHLORIDE | Tablet      |
| 63629712603 | BUPRENORPHINE HYDROCHLORIDE | Tablet      |
| 63629712604 | BUPRENORPHINE HYDROCHLORIDE | Tablet      |
| 63629712605 | BUPRENORPHINE HYDROCHLORIDE | Tablet      |
| 63629712606 | BUPRENORPHINE HYDROCHLORIDE | Tablet      |
| 63629712607 | BUPRENORPHINE HYDROCHLORIDE | Tablet      |
| 63629712608 | BUPRENORPHINE HYDROCHLORIDE | Tablet      |
| 63629727001 | BUPRENORPHINE-NALOXONE      | Tablet      |
| 63629727002 | BUPRENORPHINE-NALOXONE      | Tablet      |
| 63874108403 | SUBOXONE                    | Tablet      |

| NDC         | Drug Name                   | Formulation |
|-------------|-----------------------------|-------------|
| 63874108503 | SUBOXONE                    | Tablet      |
| 63874117303 | SUBUTEX                     | Tablet      |
| 63874117403 | SUBUTEX                     | Tablet      |
| 64725093003 | BUPRENORPHINE HYDROCHLORIDE | Tablet      |
| 64725093004 | BUPRENORPHINE HYDROCHLORIDE | Tablet      |
| 64725192403 | BUPRENORPHINE HYDROCHLORIDE | Tablet      |
| 64725192404 | BUPRENORPHINE HYDROCHLORIDE | Tablet      |
| 65162041503 | BUPRENORPHINE-NALOXONE      | Tablet      |
| 65162041509 | BUPRENORPHINE-NALOXONE      | Tablet      |
| 65162041603 | BUPRENORPHINE-NALOXONE      | Tablet      |
| 65162041609 | BUPRENORPHINE-NALOXONE      | Tablet      |
| 66336001530 | SUBOXONE                    | Tablet      |
| 66336001630 | SUBOXONE                    | Tablet      |
| 68071138003 | SUBOXONE                    | Tablet      |
| 68071151003 | SUBOXONE                    | Tablet      |
| 68258299103 | BUPRENORPHINE HYDROCHLORIDE | Tablet      |
| 68258299903 | SUBOXONE                    | Tablet      |
| 68308020230 | BUPRENORPHINE HYDROCHLORIDE | Tablet      |
| 68308020830 | BUPRENORPHINE HYDROCHLORIDE | Tablet      |
| 70518155700 | BUPRENORPHINE               | Tablet      |
| 71335035301 | BUPRENORPHINE HYDROCHLORIDE | Tablet      |
| 71335035302 | BUPRENORPHINE HYDROCHLORIDE | Tablet      |
| 71335035303 | BUPRENORPHINE HYDROCHLORIDE | Tablet      |
| 71335035304 | BUPRENORPHINE HYDROCHLORIDE | Tablet      |
| 71335035305 | BUPRENORPHINE HYDROCHLORIDE | Tablet      |
| 71335035306 | BUPRENORPHINE HYDROCHLORIDE | Tablet      |
| 71335035307 | BUPRENORPHINE HYDROCHLORIDE | Tablet      |
| 71335115403 | BUPRENORPHINE               | Tablet      |
| 76519117000 | BUPRENORPHINE HYDROCHLORIDE | Tablet      |
| 76519117001 | BUPRENORPHINE HYDROCHLORIDE | Tablet      |
| 76519117002 | BUPRENORPHINE HYDROCHLORIDE | Tablet      |
| 76519117003 | BUPRENORPHINE HYDROCHLORIDE | Tablet      |
| 76519117004 | BUPRENORPHINE HYDROCHLORIDE | Tablet      |
| 76519117005 | BUPRENORPHINE HYDROCHLORIDE | Tablet      |

**eTable 2.** Methadone Dispensing Rates per 1000 MA Enrollees, by Dispensing Type

|         | <b>National</b> | <b>Within<br/>OTP</b> | <b>Take-<br/>Home</b> |
|---------|-----------------|-----------------------|-----------------------|
| Q1 2020 | 0.976           | 0.837                 | 0.139                 |
| Q2 2020 | 1.163           | 0.967                 | 0.196                 |
| Q3 2020 | 1.961           | 1.712                 | 0.25                  |
| Q4 2020 | 2.579           | 2.252                 | 0.327                 |
| Q1 2021 | 3.629           | 3.176                 | 0.453                 |
| Q2 2021 | 4.261           | 3.755                 | 0.506                 |
| Q3 2021 | 4.519           | 4.014                 | 0.505                 |
| Q4 2021 | 4.878           | 4.342                 | 0.536                 |
| Q1 2022 | 4.711           | 4.17                  | 0.541                 |



**eTable 3.** Methadone Dispensing Rates per 1000 MA Enrollees, by Age and Dual Eligibility Status

|         | 65 and Over |               | Under 65 |               |
|---------|-------------|---------------|----------|---------------|
|         | Dual        | Other/Unknown | Dual     | Other/Unknown |
| Q1 2020 | 2.698       | 0.247         | 9.387    | 1.978         |
| Q2 2020 | 3.344       | 0.247         | 11.911   | 2.665         |
| Q3 2020 | 5.726       | 0.383         | 18.492   | 5.155         |
| Q4 2020 | 6.961       | 0.479         | 25.159   | 7.683         |
| Q1 2021 | 10.17       | 0.742         | 34.186   | 11.493        |
| Q2 2021 | 11.8        | 0.84          | 39.525   | 12.917        |
| Q3 2021 | 12.495      | 0.879         | 43.475   | 13.127        |
| Q4 2021 | 13.894      | 0.958         | 47.018   | 13.982        |
| Q1 2022 | 10.509      | 1.009         | 43.83    | 13.452        |

**eTable 4.** Rates of Buprenorphine Dispensed From Pharmacies per 1000 MA Enrollees, by Age

|         | <b>National</b> | <b>Beneficiaries<br/>65+</b> | <b>Beneficiaries<br/>&lt;65</b> |
|---------|-----------------|------------------------------|---------------------------------|
| 2019 Q1 | 4.64            | 1.526                        | 31.679                          |
| 2019 Q2 | 5.093           | 1.64                         | 34.48                           |
| 2019 Q3 | 5.378           | 1.733                        | 35.88                           |
| 2019 Q4 | 5.706           | 1.809                        | 38.128                          |
| 2020 Q1 | 6.204           | 2.189                        | 40.848                          |
| 2020 Q2 | 6.38            | 2.204                        | 41.902                          |
| 2020 Q3 | 6.752           | 2.336                        | 43.682                          |
| 2020 Q4 | 6.947           | 2.417                        | 44.621                          |
| 2021 Q1 | 6.89            | 2.608                        | 44.909                          |
| 2021 Q2 | 7.301           | 2.726                        | 47.231                          |
| 2021 Q3 | 7.707           | 2.87                         | 49.395                          |
| 2021 Q4 | 7.789           | 2.894                        | 50.084                          |
| 2022 Q1 | 7.448           | 2.923                        | 50.001                          |
