# Supplementary material for: Trends in Methadone Dispensing for Opioid Use Disorder After Medicare Payment Policy Changes
Source: PubMed Central journal article supplement (PMC10199341; doi:10.1001/jamanetworkopen.2023.14328), 2023-05-19
Supplement: jamanetwopen-e2314328-s002.pdf [file jamanetwopen-e2314328-s002.pdf]

## Data Sharing Statement

Taylor. Trends in Methadone Dispensing for Opioid Use Disorder After Medicare Payment Policy Changes. *JAMA Netw Open*. Published May 19, 2023.

doi:10.1001/jamanetworkopen.2023.14328

### Data

**Data available:** No

### Additional Information

**Explanation for why data not available:** Our data were accessed as part of a data use agreement with the data owner, which prohibits access to the data for those not on the original agreement.
